# Supplementary material for: An upconverted nanoparticle–porphyrin metal–organic framework platform for near-infrared detection of nitenpyram
Source: Royal Society of Chemistry journal article supplement (doi:10.1039/d3ay00298e), 2023-01-01
Supplement: d3ay00298e1.pdf [file d3ay00298e1.pdf]

## Supporting Information

### **Upconverted nanoparticle-porphyrin metal organic framework platform for near-infrared detection of nitenpyram**

Xiong Chen<sup>a</sup>, Yingxue Li<sup>a</sup>, Juying Li<sup>b</sup>, Li Cao<sup>b</sup>, Cheng Yao<sup>a\*</sup>

<sup>a</sup>College of Chemistry and Molecular Engineering, Nanjing Tech University, Nanjing 211816, P. R. China.

<sup>b</sup>Nanjing Institute of Environmental Science, Key Laboratory of Pesticide Environmental Assessment and Pollution Control, Nanjing 210042, China.

\*E-mail address for the corresponding author: [yaocheng@njtech.edu.cn](mailto:yaocheng@njtech.edu.cn)

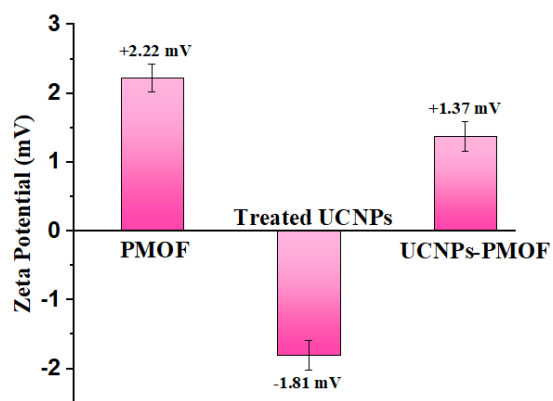

**Figure S1.** Zeta potential of PMOF, Treated UCNPs and UCNPs-PMOF nanoparticles in ethanol solution.

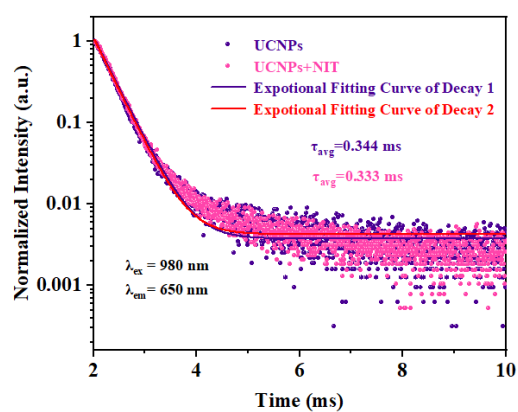

**Figure S2.** Lifetime decay curve of UCNPs at 654 nm before and after adding NIT.

**Table S1.** Comparison of structural strategies and sensing performance with reported fluorescent sensors for the detection of nitenpyram.

| Fluorescent Probe         | Detection method | Fluorescence Linear range       | LOD                      | Whether the ratio | Ref.      |
|---------------------------|------------------|---------------------------------|--------------------------|-------------------|-----------|
| N-CQDs @ SiO <sub>2</sub> | Downconversion   | 0-300 mg·L <sup>-1</sup>        | 1.53 mg·L <sup>-1</sup>  | No                | 1         |
| EY @ Zr-MOF               | Downconversion   | 0-0.1 mM                        | 0.94 μM                  | No                | 2         |
| Rho 6G @ 1                | Downconversion   | /                               | 0.48 nM                  | Yes               | 3         |
| Rho 6G @ 2                | Downconversion   | /                               | 0.30 nM                  | Yes               | 3         |
| PMOF                      | Downconversion   | 0.05 - 10.0 μg·mL <sup>-1</sup> | 0.03 μg·mL <sup>-1</sup> | No                | 4         |
| Ln-MOF                    | Downconversion   | 0-0.05 mM                       | 0.71 nM                  | No                | 5         |
| UCNPs-PMOF                | Downconversion   | 0-115 μM                        | 0.76 μM                  | No                | This work |
|                           | Upconversion     | 0-115 μM                        | 0.22 μM                  | Yes               |           |

## References

1. M. Rostami, B. Zhang and Y. Zhang, *Spectrochimica acta. Part A, Molecular and biomolecular spectroscopy*, 2023, **292**, 122387.
2. Z. H. Wei, D. S. Chen, Z. F. Guo, P. Y. Jia and H. Z. Xing, *Inorg. Chem.*, 2020, **59**, 5386-5393.
3. L. Yang, Y. L. Liu, C. G. Liu, F. Ye and Y. Fu, *J Hazard Mater*, 2020, **381**.
4. J. T. Liu, W. H. Xiong, L. Y. Ye, W. S. Zhang and H. Yang, *J. Agric. Food Chem.*, 2020, **68**, 5572-5578.
5. Z. D. Zhou, C. Y. Wang, G. S. Zhu, B. Du, B. Y. Yu and C. C. Wang, *J. Mol. Struct.*, 2022, **1251**, 11.
